# Supplementary material for: Genomic Epidemiology and Heterogeneity of SRLV in Italy from 1998 to 2019
Source: MDPI journal article supplement (doi:10.3390/v13122338), 2021-11-23
Supplement: s1 [file s1]

**Table S1: Dataset description of SRLV samples analysed in the study.**

| <b>ID strain</b> | <b>Year</b> | <b>Region</b> | <b>Species</b> | <b>Accession number</b> | <b>Genotypes /subtypes</b> | <b>Reference</b>          |
|------------------|-------------|---------------|----------------|-------------------------|----------------------------|---------------------------|
| SRLV_To1.89      | 1989        | Piemonte      | Goat           | MH374290                | B1                         | Bertolotti L., et al 2018 |
| 1G/SA/98         | 1998        | Sardegna      | Goat           | FR694915                | B1                         | Giammarioli M. et al 2011 |
| TC2/SA/99        | 1999        | Sardegna      | Goat           | FR694916                | B1                         | Giammarioli M. et al 2011 |
| 414/UM/00        | 2000        | Umbria        | Sheep          | FR694696                | A11                        | In this study             |
| 22803.29.UM.10   | 2000        | Umbria        | Goat           | FR693817                | A11                        | In this study             |
| It561            | 2005        | Piemonte      | Sheep          | AY265455                | A19                        | Grego E et al 2005        |
| 7008/UM/01       | 2001        | Umbria        | Sheep          | FR695719                | B2                         | Giammarioli M. et al 2011 |
| 74528.6/SA/02    | 2002        | Sardegna      | Goat           | FR694920                | E2                         | Giammarioli M. et al 2011 |
| 74528.13/SA/02   | 2002        | Sardegna      | Goat           | FR694921                | E2                         | Giammarioli M. et al 2011 |
| Fonni            | 2003        | Sardegna      | Sheep          | JF502416                | B3                         | Bertolotti L., et al 2011 |
| Volterra         | 2004        | Toscana       | Sheep          | JF502417                | B3                         | Bertolotti L., et al 2011 |
| It-008g03        | 2006        | Piemonte      | Goat           | EU010125                | A8                         | Grego E., et al 2007      |
| It-014s03        | 2006        | Piemonte      | Sheep          | EF676000                | B2                         | Grego E., et al 2007      |
| It-025g02        | 2006        | Piemonte      | Goat           | EU010124                | E1                         | Grego E., et al 2007      |
| It-026g02        | 2006        | Piemonte      | Goat           | EF676003                | E1                         | Grego E., et al 2007      |
| It-027g02        | 2006        | Piemonte      | Goat           | EF676004                | E1                         | Grego E., et al 2007      |
| It-029g02        | 2006        | Piemonte      | Goat           | EF676005                | E1                         | Grego E., et al 2007      |
| It-030g03        | 2006        | Piemonte      | Goat           | EF676006                | A8                         | Grego E., et al 2007      |
| It-035s05        | 2006        | Piemonte      | Sheep          | EF676007                | B1                         | Grego E., et al 2007      |
| It-037s05        | 2006        | Piemonte      | Sheep          | EF676009                | B1                         | Grego E., et al 2007      |
| It-043g05        | 2006        | Piemonte      | Goat           | EU010121                | B1                         | Grego E., et al 2007      |
| It-045g05        | 2006        | Piemonte      | Goat           | EF676013                | B1                         | Grego E., et al 2007      |
| It-047g05        | 2006        | Piemonte      | Goat           | EU010120                | B1                         | Grego E., et al 2007      |
| It-051g06        | 2006        | Piemonte      | Goat           | EF676014                | E1                         | Grego E., et al 2007      |
| It-053s01        | 2006        | Piemonte      | Sheep          | EF676016                | A9                         | Grego E., et al 2007      |
| It-052g06        | 2006        | Piemonte      | Goat           | EF676015                | B1                         | Grego E., et al 2007      |
| It-090g06        | 2006        | Piemonte      | Goat           | EF676021                | E1                         | Grego E., et al 2007      |
| It-069s01        | 2006        | Piemonte      | Sheep          | EF676020                | A9                         | Grego E., et al 2007      |

|               |      |          |       |          |                    |                           |
|---------------|------|----------|-------|----------|--------------------|---------------------------|
| It-064s01     | 2006 | Piemonte | Sheep | EF676019 | A9                 | Grego E., et al 2007      |
| It-063s01     | 2006 | Piemonte | Sheep | EF676018 | A9                 | Grego E., et al 2007      |
| It-060s01     | 2006 | Piemonte | Sheep | EF676017 | A9                 | Grego E., et al 2007      |
| 32214/UM/06   | 2006 | Umbria   | Sheep | FR694691 | B3                 | Giammarioli M. et al 2011 |
| 51937/UM/06   | 2006 | Umbria   | Goat  | FR695064 | recombinant A9/A11 | In this study             |
| It-103g02     | 2007 | Piemonte | Goat  | EF676022 | E1                 | Grego E., et al 2007      |
| It-130g02     | 2007 | Piemonte | Goat  | EF676025 | E1                 | Grego E., et al 2007      |
| It-121g02     | 2007 | Piemonte | Goat  | EF676024 | E1                 | Grego E., et al 2007      |
| It-104g02     | 2007 | Piemonte | Goat  | EF676023 | E1                 | Grego E., et al 2007      |
| 04/TO/08      | 2008 | Toscana  | Goat  | FR694917 | B1                 | Giammarioli M. et al 2011 |
| 380/TO/08     | 2008 | Toscana  | Goat  | FR694918 | B1                 | Giammarioli M. et al 2011 |
| Roccaverano   | 2008 | Piemonte | Goat  | EU293537 | E1                 | Reina R. et al 2009       |
| 10294/MA/09   | 2009 | Marche   | Goat  | FR694689 | B3                 | Giammarioli M. et al 2011 |
| 10298/MA/09   | 2009 | Marche   | Sheep | FR694914 | A24                | In this study             |
| 10308/MA/09   | 2009 | Marche   | Sheep | FR694909 | recombinant A3/A11 | In this study             |
| 63088/UM/09   | 2009 | Umbria   | Goat  | FR694919 | B1                 | Giammarioli M. et al 2011 |
| ME.24/UM/09   | 2009 | Umbria   | Goat  | FR694912 | E2                 | Giammarioli M. et al 2011 |
| 6770/UM/09    | 2009 | Umbria   | Goat  | FR693815 | A11                | Giammarioli M. et al 2011 |
| 5480.2/SA/09  | 2009 | Sardegna | Sheep | FR694686 | B3                 | Giammarioli M. et al 2011 |
| 5480.10/SA/09 | 2009 | Sardegna | Sheep | FR694687 | B3                 | Giammarioli M. et al 2011 |
| 36384.1/SA/09 | 2009 | Sardegna | Goat  | FR694688 | B3                 | Giammarioli M. et al 2011 |
| 06/PI/09      | 2009 | Piemonte | Sheep | FR687200 | B2                 | Giammarioli M. et al 2011 |
| 10310/MA/09   | 2009 | Marche   | Sheep | FR694910 | recombinant A3/A11 | In this study             |
| 2803.35/UM/10 | 2010 | Toscana  | Goat  | FR693818 | A11                | Giammarioli M. et al 2011 |
| 5012/UM/10    | 2010 | Umbria   | Goat  | FR693819 | A11                | Giammarioli M. et al 2011 |
| 6440/UM/10    | 2010 | Umbria   | Goat  | FR693820 | A11                | Giammarioli M. et al 2011 |
| 1810/UM/10    | 2010 | Umbria   | Goat  | FR693821 | A11                | Giammarioli M. et al 2011 |
| 2803.34/UM/10 | 2010 | Toscana  | Goat  | FR693822 | A11                | Giammarioli M. et al 2011 |
| 2797.4/UM/10  | 2010 | Toscana  | Sheep | FR694692 | A11                | Giammarioli M. et al 2011 |

|               |      |         |       |          |     |                           |
|---------------|------|---------|-------|----------|-----|---------------------------|
| 2607/UM/10    | 2010 | Umbria  | Goat  | FR693823 | A11 | Giammarioli M. et al 2011 |
| 0222/UM/10    | 2010 | Umbria  | Goat  | FR693810 | A11 | Giammarioli M. et al 2011 |
| 2798.4/UM/10  | 2010 | Umbria  | Goat  | FR693812 | A11 | Giammarioli M. et al 2011 |
| 2803.32/UM/10 | 2010 | Toscana | Goat  | FR693811 | A11 | Giammarioli M. et al 2011 |
| 2803.42/UM/10 | 2010 | Toscana | Goat  | FR693809 | A11 | Giammarioli M. et al 2011 |
| 2803.28/UM/10 | 2010 | Toscana | Goat  | FR693808 | A11 | Giammarioli M. et al 2011 |
| 2356/UM/10    | 2010 | Umbria  | Goat  | FR693824 | A11 | Giammarioli M. et al 2011 |
| 2797.11/UM/10 | 2010 | Toscana | Sheep | FR694693 | A11 | Giammarioli M. et al 2011 |
| 6780/UM/10    | 2010 | Umbria  | Goat  | FR693816 | A11 | Giammarioli M. et al 2011 |
| 1462/UM/10    | 2010 | Umbria  | Goat  | FR693814 | A11 | Giammarioli M. et al 2011 |
| 2393/UM/10    | 2010 | Umbria  | Goat  | FR693813 | A11 | Giammarioli M. et al 2011 |
| 7995/UM/10    | 2010 | Umbria  | Goat  | FR693832 | A11 | Giammarioli M. et al 2011 |
| 5065/UM/10    | 2010 | Umbria  | Goat  | FR693831 | A11 | Giammarioli M. et al 2011 |
| 7978/UM/10    | 2010 | Umbria  | Goat  | FR693830 | A11 | Giammarioli M. et al 2011 |
| 6408/UM/10    | 2010 | Umbria  | Goat  | FR693829 | A11 | Giammarioli M. et al 2011 |
| 2357/UM10     | 2010 | Umbria  | Goat  | FR693827 | A11 | Giammarioli M. et al 2011 |
| 4150/UM/10    | 2010 | Umbria  | Goat  | FR693828 | A11 | Giammarioli M. et al 2011 |
| 2797.1/UM/10  | 2010 | Toscana | Sheep | FR694694 | A11 | Giammarioli M. et al 2011 |
| 9440/UM/10    | 2010 | Umbria  | Goat  | FR693826 | A11 | Giammarioli M. et al 2011 |
| 0245/UM/10    | 2010 | Umbria  | Goat  | FR693825 | A11 | Giammarioli M. et al 2011 |
| 0249/UM/10    | 2010 | Umbria  | Goat  | FR694690 | B3  | Giammarioli M. et al 2011 |
| 1017/UM/10    | 2010 | Umbria  | Goat  | FR694908 | A9  | Giammarioli M. et al 2011 |
| ME.30/UM/10   | 2010 | Umbria  | Goat  | FR694913 | E2  | Giammarioli M. et al 2011 |
| 2803.25/UM/10 | 2010 | Toscana | Goat  | FR694911 | E2  | Giammarioli M. et al 2011 |
| LaSaz06/UM/10 | 2010 | Umbria  | Sheep | FR828809 | A9  | Giammarioli M. et al 2011 |
| 11058/UM/10   | 2010 | Umbria  | Sheep | FR828810 | B3  | Giammarioli M. et al 2011 |
| 11067/UM/10   | 2010 | Umbria  | Sheep | FR828811 | B3  | Giammarioli M. et al 2011 |
| 11063/UM/10   | 2010 | Umbria  | Sheep | FR828812 | B3  | Giammarioli M. et al 2011 |

|              |      |                    |       |          |     |                           |
|--------------|------|--------------------|-------|----------|-----|---------------------------|
| 11059/UM/10  | 2010 | Umbria             | Sheep | FR828813 | B3  | Giammarioli M. et al 2011 |
| AN13/MA/10   | 2010 | Marche             | Sheep | FR828814 | B2  | Giammarioli M. et al 2011 |
| PS075/MA/10  | 2010 | Marche             | Sheep | FR828815 | B3  | Giammarioli M. et al 2011 |
| AN10/MA/10   | 2010 | Marche             | Sheep | FR828816 | B3  | Giammarioli M. et al 2011 |
| La1SAZ/UM/10 | 2010 | Umbria             | Sheep | FR694695 | A11 | In this study             |
| 76_SI_2011   | 2011 | Sicilia            | Goat  | LR723571 | B1  | In this study             |
| 77_SI_2011   | 2011 | Sicilia            | Goat  | LR723578 | B1  | In this study             |
| 78_SI_2011.  | 2011 | Sicilia            | Goat  | LR723572 | B1  | In this study             |
| 79_SI_2011   | 2011 | Sicilia            | Goat  | LR723573 | B1  | In this study             |
| 80_SI_2011   | 2011 | Sicilia            | Goat  | LR723574 | B1  | In this study             |
| 81_SI_2011   | 2011 | Sicilia            | Goat  | LR723575 | B1  | In this study             |
| 82_SI_2011   | 2011 | Sicilia            | Goat  | LR723576 | B1  | In this study             |
| 83_SI_2011   | 2011 | Sicilia            | Goat  | LR723087 | B1  | In this study             |
| 84_SI_2011   | 2011 | Sicilia            | Goat  | LR723090 | B1  | In this study             |
| 85_SI_2011   | 2011 | Sicilia            | Goat  | LR723091 | B1  | In this study             |
| 86_SI_2011   | 2011 | Sicilia            | Goat  | LR723092 | B1  | In this study             |
| 87_SI_2011   | 2011 | Sicilia            | Goat  | LR723093 | B1  | In this study             |
| 89_LZ_2011   | 2011 | Lazio              | Sheep | LR723094 | B3  | In this study             |
| 94_UM_2011   | 2011 | Umbria             | Goat  | LR723095 | B1  | In this study             |
| 95_UM_2011   | 2011 | Umbria             | Goat  | LR723096 | B1  | In this study             |
| 96_UM_2011   | 2011 | Umbria             | Goat  | LR723097 | B1  | In this study             |
| 97_UM_2011   | 2011 | Umbria             | Goat  | LR723098 | B1  | In this study             |
| 98_TR_2012   | 2012 | Trentino-AltoAdige | Goat  | LR723321 | B1  | In this study             |
| 99_TR_2012   | 2012 | Trentino-AltoAdige | Goat  | LR723322 | B1  | In this study             |
| 100_TR_2012  | 2012 | Trentino-AltoAdige | Goat  | LR723323 | B1  | In this study             |
| 101_TR_2012  | 2012 | Trentino-AltoAdige | Goat  | LR723540 | B1  | In this study             |
| 102_TR_2012  | 2012 | Trentino-AltoAdige | Goat  | LR723541 | B1  | In this study             |
| 103_TR_2012  | 2012 | Trentino-AltoAdige | Goat  | LR723542 | B1  | In this study             |
| 104_TR_2012  | 2012 | Trentino-AltoAdige | Goat  | LR723546 | B1  | In this study             |

|             |      |                    |       |          |     |               |
|-------------|------|--------------------|-------|----------|-----|---------------|
| 105_TR_2012 | 2012 | Trentino-AltoAdige | Goat  | LR723547 | B1  | In this study |
| 106_TR_2012 | 2012 | Trentino-AltoAdige | Goat  | LR723548 | B1  | In this study |
| 107_TR_2012 | 2012 | Trentino-AltoAdige | Goat  | LR723549 | B1  | In this study |
| 108_TR_2012 | 2012 | Trentino-AltoAdige | Goat  | LR723545 | B1  | In this study |
| 109_TR_2012 | 2012 | Trentino-AltoAdige | Goat  | LR723543 | B1  | In this study |
| 110_TR_2012 | 2012 | Trentino-AltoAdige | Goat  | LR723544 | B1  | In this study |
| 111_SI_2012 | 2012 | Sicilia            | Goat  | LR723579 | A23 | In this study |
| 112_TR_2012 | 2012 | Trentino-AltoAdige | Goat  | LR723556 | B1  | In this study |
| 113_TR_2012 | 2012 | Trentino-AltoAdige | Goat  | LR723557 | A5  | In this study |
| 114_TR_2012 | 2012 | Trentino-AltoAdige | Goat  | LR723558 | B1  | In this study |
| 115_TR_2012 | 2012 | Trentino-AltoAdige | Goat  | LR723559 | B1  | In this study |
| 118_TR_2012 | 2012 | Trentino-AltoAdige | Goat  | LR723560 | B1  | In this study |
| 119_TR_2012 | 2012 | Trentino-AltoAdige | Goat  | LR723561 | B1  | In this study |
| 120_TR_2012 | 2012 | Trentino-AltoAdige | Goat  | LR723562 | B1  | In this study |
| 121_TR_2012 | 2012 | Trentino-AltoAdige | Goat  | LR723563 | B1  | In this study |
| 122_TR_2012 | 2012 | Trentino-AltoAdige | Goat  | LR723564 | B1  | In this study |
| 123_TR_2012 | 2012 | Trentino-AltoAdige | Goat  | LR723565 | B1  | In this study |
| 124_TR_2012 | 2012 | Trentino-AltoAdige | Goat  | LR723566 | B1  | In this study |
| 125_TR_2012 | 2012 | Trentino-AltoAdige | Goat  | LR723567 | B1  | In this study |
| 126_TR_2012 | 2012 | Trentino-AltoAdige | Goat  | LR723568 | B1  | In this study |
| 127_TR_2012 | 2012 | Trentino-AltoAdige | Goat  | LR723569 | B1  | In this study |
| 128_TR_2012 | 2012 | Trentino-AltoAdige | Goat  | LR723570 | B1  | In this study |
| 129_TR_2012 | 2012 | Trentino-AltoAdige | Goat  | LR723577 | B1  | In this study |
| 131_SI_2012 | 2012 | Sicilia            | Sheep | LR723580 | B1  | In this study |
| 133_VE_2012 | 2012 | Veneto             | Goat  | LR723581 | B1  | In this study |
| 134_SI_2012 | 2012 | Sicilia            | Sheep | LR723582 | A23 | In this study |
| 135_MA_2013 | 2013 | Marche             | Goat  | LR723583 | B1  | In this study |
| 138_CA_2013 | 2013 | Calabria           | Sheep | LR723584 | B3  | In this study |
| 140_MA_2014 | 2014 | Marche             | Goat  | LR732016 | B1  | In this study |

|              |      |               |       |          |            |               |
|--------------|------|---------------|-------|----------|------------|---------------|
| 143_UM_2014  | 2014 | Umbria        | Goat  | LR732017 | B1         | In this study |
| 144_LO_2014  | 2014 | Lombardia     | Goat  | LR735686 | B1         | In this study |
| 145_LO_2014  | 2014 | Lombardia     | Goat  | LR735687 | B1         | In this study |
| 146_LO_2014  | 2014 | Lombardia     | Goat  | LR735688 | B1         | In this study |
| 147_LO_2014  | 2014 | Lombardia     | Goat  | LR735689 | B1         | In this study |
| 151_UM_2014  | 2014 | Umbria        | Sheep | LR735691 | B3         | In this study |
| 152_UM_2014  | 2014 | Umbria        | Sheep | LR735692 | B3         | In this study |
| 155_TO_2014  | 2014 | Toscana       | Sheep | LR735693 | B3         | In this study |
| 158_UM_2014  | 2014 | Umbria        | Goat  | LR735694 | B1         | In this study |
| 159_BA_2014  | 2014 | Basilicata    | Sheep | LR732018 | A3         | In this study |
| 160_CA_2014  | 2014 | Calabria      | Sheep | LR735695 | Unassigned | In this study |
| 174_UM_2015  | 2015 | Umbria        | Sheep | LR735696 | B3         | In this study |
| 179_UM_2015  | 2015 | Umbria        | Sheep | LR735697 | A19        | In this study |
| 180_UM_2015  | 2015 | Umbria        | Sheep | LR735698 | B1         | In this study |
| 181_BA_2015  | 2015 | Basilicata    | Sheep | LR735699 | B3         | In this study |
| 183_PI_2015  | 2015 | Piemonte      | Goat  | LR735700 | B1         | In this study |
| 185_VE_2016  | 2016 | Veneto        | Goat  | LR732244 | B1         | In this study |
| 186_BA_2016  | 2016 | Basilicata    | Sheep | LR732245 | B3         | In this study |
| 194_VDA_2016 | 2016 | Valle d'Aosta | Goat  | LR732246 | B1         | In this study |
| 196_MA_2016  | 2016 | Marche        | Sheep | LR732247 | B3         | In this study |
| 199_PU_2016  | 2016 | Puglia        | Goat  | LR732248 | B1         | In this study |
| 200_LZ_2016  | 2016 | Lazio         | Sheep | LR732249 | B3         | In this study |
| 201_LZ_2016  | 2016 | Lazio         | Sheep | LR732250 | B3         | In this study |
| 202_TO_2016  | 2016 | Toscana       | Sheep | LR732251 | B2         | In this study |
| 208_UM_2016  | 2016 | Umbria        | Sheep | LR732252 | B2         | In this study |
| 211_SA_2016  | 2016 | Sardegna      | Goat  | LR732253 | B1         | In this study |
| 219_AB_2016  | 2016 | Abruzzo       | Sheep | LR732254 | B2         | In this study |
| 220_AB_2016  | 2016 | Abruzzo       | Sheep | LR732255 | B2         | In this study |
| 221_AB_2016  | 2016 | Abruzzo       | Goat  | LR732256 | B1         | In this study |
| 223_CA_2016  | 2016 | Calabria      | Sheep | LR732257 | A23        | In this study |

|              |      |                |       |          |     |                           |
|--------------|------|----------------|-------|----------|-----|---------------------------|
| 224_CA_2016  | 2016 | Calabria       | Sheep | LR732258 | A23 | In this study             |
| 225_AB_2016  | 2016 | Abruzzo        | Goat  | LR732259 | B1  | In this study             |
| 226_TO_2016  | 2016 | Toscana        | Goat  | LR732260 | B1  | In this study             |
| SRLV001      | 2017 | Piemonte       | Sheep | MG554402 | B2  | Colitti B., et al 2017    |
| SRLV002      | 2017 | Piemonte       | Goat  | MG554403 | A8  | Colitti B., et al 2017    |
| SRLV003      | 2017 | Piemonte       | Goat  | MG554404 | A8  | Colitti B., et al 2017    |
| SRLV004      | 2017 | Piemonte       | Goat  | MG554405 | A8  | Colitti B., et al 2017    |
| SRLV005      | 2017 | Piemonte       | Goat  | MG554406 | A8  | Colitti B., et al 2017    |
| SRLV006      | 2017 | Piemonte       | Goat  | MG554407 | A8  | Colitti B., et al 2017    |
| SRLV007      | 2017 | Piemonte       | Goat  | MG554408 | A8  | Colitti B., et al 2017    |
| SRLV009      | 2017 | Piemonte       | Goat  | MG554409 | A20 | Colitti B., et al 2017    |
| SRLV010      | 2017 | Piemonte       | Goat  | MG554410 | B1  | Colitti B., et al 2017    |
| SRLV014      | 2017 | Piemonte       | Goat  | MG554411 | B1  | Colitti B., et al 2017    |
| SRLV016      | 2017 | Piemonte       | Goat  | MG554412 | B1  | Colitti B., et al 2017    |
| SRLV017      | 2017 | Piemonte       | Goat  | MG554413 | B1  | Colitti B., et al 2017    |
| SRLV020      | 2017 | Piemonte       | Goat  | MG554414 | B1  | Colitti B., et al 2017    |
| SRLV024      | 2017 | Piemonte       | Goat  | MH374283 | A8  | Bertolotti L., et al 2018 |
| SRLV025      | 2017 | Piemonte       | Goat  | MH374284 | A8  | Bertolotti L., et al 2018 |
| SRLV026      | 2017 | Piemonte       | Goat  | MH374285 | A8  | Bertolotti L., et al 2018 |
| SRLV032      | 2017 | Piemonte       | Goat  | MH374286 | A8  | Bertolotti L., et al 2018 |
| SRLV038      | 2017 | Piemonte       | Sheep | MH374287 | A19 | Bertolotti L., et al 2018 |
| SRLV042      | 2017 | Piemonte       | Sheep | MH374288 | B2  | Bertolotti L., et al 2018 |
| SRLV_Taccone | 2017 | Piemonte       | Goat  | MH374289 | B1  | Bertolotti L., et al 2018 |
| SRLV_VdA     | 2017 | Piemonte       | Goat  | MH374291 | A8  | Bertolotti L., et al 2018 |
| 227_PI_2016  | 2017 | Piemonte       | Goat  | LR732261 | B1  | In this study             |
| 228_EMR_2017 | 2017 | Emilia Romagna | Goat  | LR732722 | B1  | In this study             |
| 229_EMR_2017 | 2017 | Emilia Romagna | Goat  | LR732723 | B1  | In this study             |
| 230_AB_2017  | 2017 | Abruzzo        | Goat  | LR732724 | B1  | In this study             |
| 231_PI_2017  | 2017 | Piemonte       | Goat  | LR732725 | B1  | In this study             |
| 232_UM_2017  | 2017 | Umbria         | Goat  | LR732726 | A20 | In this study             |

|             |      |                    |       |          |     |               |
|-------------|------|--------------------|-------|----------|-----|---------------|
| 235_UM_2017 | 2017 | Umbria             | Goat  | LR732727 | A20 | In this study |
| 237_PI_2017 | 2017 | Piemonte           | Goat  | LR732728 | A20 | In this study |
| 238_BA_2017 | 2017 | Basilicata         | Sheep | LR732729 | B3  | In this study |
| 239_PI_2017 | 2017 | Piemonte           | Sheep | LR732730 | B1  | In this study |
| 240_LO_2017 | 2017 | Lombardia          | Goat  | LR732731 | B1  | In this study |
| 241_UM_2017 | 2017 | Umbria             | Sheep | LR732732 | B3  | In this study |
| 242_PI_2017 | 2017 | Piemonte           | Goat  | LR732733 | B1  | In this study |
| 243_UM_2017 | 2017 | Umbria             | Sheep | LR732734 | B3  | In this study |
| 244_MA_2017 | 2017 | Marche             | Goat  | LR732735 | A19 | In this study |
| 245_MA_2017 | 2017 | Marche             | Goat  | LR732736 | A19 | In this study |
| 246_UM_2017 | 2017 | Umbria             | Goat  | LR732737 | B1  | In this study |
| 247_UM_2017 | 2017 | Umbria             | Sheep | LR732738 | B3  | In this study |
| 248_CA_2017 | 2017 | Calabria           | Goat  | LR732739 | B1  | In this study |
| 249_PI_2017 | 2017 | Piemonte           | Goat  | LR732740 | A20 | In this study |
| 250_UM_2017 | 2017 | Umbria             | Sheep | LR732741 | A24 | In this study |
| 251_PI_2017 | 2017 | Piemonte           | Goat  | LR732742 | B1  | In this study |
| 253_BA_2017 | 2017 | Basilicata         | Sheep | LR732743 | A9  | In this study |
| 254_TR_2018 | 2018 | Trentino-AltoAdige | Goat  | LR735175 | B1  | In this study |
| 255_TR_2018 | 2018 | Trentino-AltoAdige | Goat  | LR735176 | A5  | In this study |
| 256_TR_2018 | 2018 | Trentino-AltoAdige | Goat  | LR735177 | B1  | In this study |
| 257_UM_2018 | 2018 | Umbria             | Sheep | LR735178 | B3  | In this study |
| 258_UM_2018 | 2018 | Umbria             | Sheep | LR735179 | B3  | In this study |
| 259_UM_2018 | 2018 | Umbria             | Sheep | LR735180 | B3  | In this study |
| 261_BA_2018 | 2018 | Basilicata         | Sheep | LR735181 | B3  | In this study |
| 262_BA_2018 | 2018 | Basilicata         | Sheep | LR735182 | B2  | In this study |
| 263_BA_2018 | 2018 | Basilicata         | Sheep | LR735183 | B2  | In this study |
| 264_BA_2018 | 2018 | Basilicata         | Sheep | LR735184 | B2  | In this study |
| 265_BA_2018 | 2018 | Basilicata         | Sheep | LR735185 | B3  | In this study |
| 266_BA_2018 | 2018 | Basilicata         | Sheep | LR735186 | B3  | In this study |
| 271_AB_2018 | 2018 | Abruzzo            | Sheep | LR735187 | B3  | In this study |



|             |      |            |       |          |     |               |
|-------------|------|------------|-------|----------|-----|---------------|
| 272_UM_2018 | 2018 | Umbria     | Goat  | LR735188 | B1  | In this study |
| 281_TO_2018 | 2018 | Toscana    | Sheep | LR735191 | B3  | In this study |
| 276_PI_2018 | 2018 | Piemonte   | Goat  | LR735189 | B1  | In this study |
| 277_PI_2018 | 2018 | Piemonte   | Goat  | LR735190 | B1  | In this study |
| 282_TO_2018 | 2018 | Toscana    | Sheep | LR735192 | B3  | In this study |
| 283_CA_2018 | 2018 | Calabria   | Sheep | LR735193 | B2  | In this study |
| 284_UM_2018 | 2018 | Umbria     | Goat  | LR735194 | B1  | In this study |
| 286_UM_2018 | 2018 | Umbria     | Sheep | LR735202 | A11 | In this study |
| 287_PI_2018 | 2018 | Piemonte   | Goat  | LR735203 | A8  | In this study |
| 288_MA_2018 | 2018 | Marche     | Goat  | LR735204 | B1  | In this study |
| 289_BA_2018 | 2018 | Basilicata | Goat  | LR735205 | B1  | In this study |
| 290_BA_2018 | 2018 | Basilicata | Sheep | LR735206 | B3  | In this study |
| 296_UM_2018 | 2018 | Umbria     | Sheep | LR735207 | B2  | In this study |
| 297_LZ_2018 | 2018 | Lazio      | Sheep | LR735208 | A3  | In this study |
| 299_UM_2018 | 2018 | Umbria     | Goat  | LR735209 | B1  | In this study |
| 300_UM_2018 | 2018 | Umbria     | Goat  | LR735210 | A9  | In this study |
| 302_TO_2018 | 2018 | Toscana    | Goat  | LR735211 | B1  | In this study |
| 303_PI_2018 | 2018 | Piemonte   | Goat  | LR735212 | B1  | In this study |
| 304_UM_2018 | 2018 | Umbria     | Goat  | LR735213 | B1  | In this study |
| 307_LZ_2018 | 2018 | Lazio      | Sheep | LR735214 | A24 | In this study |
| 309_PI_2018 | 2018 | Piemonte   | Goat  | LR735215 | A8  | In this study |
| 310_CA_2018 | 2018 | Calabria   | Sheep | LR735216 | B2  | In this study |
| 311_CA_2018 | 2018 | Calabria   | Sheep | LR735217 | B2  | In this study |
| 312_CA_2018 | 2018 | Calabria   | Sheep | LR735218 | B2  | In this study |
| 317_UM_2019 | 2019 | Umbria     | Sheep | LR735229 | B3  | In this study |
| 321_PU_2019 | 2019 | Puglia     | Sheep | LR735230 | B2  | In this study |
| 322_UM_2019 | 2019 | Umbria     | Sheep | LR735231 | B3  | In this study |
| 323_UM_2019 | 2019 | Umbria     | Sheep | LR735232 | B3  | In this study |
| 324_UM_2019 | 2019 | Umbria     | Sheep | LR735233 | A11 | In this study |
| 326_BA_2019 | 2019 | Basilicata | Goat  | LR735234 | B1  | In this study |

|             |      |            |       |          |     |               |
|-------------|------|------------|-------|----------|-----|---------------|
| 327_BA_2019 | 2019 | Basilicata | Goat  | LR735235 | B1  | In this study |
| 328_UM_2019 | 2019 | Umbria     | Sheep | LR735236 | B3  | In this study |
| 329_CM_2019 | 2019 | Campania   | Goat  | LR735237 | A20 | In this study |
| 332_BA_2019 | 2019 | Basilicata | Sheep | LR735238 | A9  | In this study |
| 333_BA_2019 | 2019 | Basilicata | Sheep | LR735239 | A9  | In this study |
| 334_BA_2019 | 2019 | Basilicata | Sheep | LR735240 | A9  | In this study |
